# Supplementary material for: Development of a whole-cell biosensor for the determination of tyrosine in urine for point-of-care diagnostics
Source: Royal Society of Chemistry journal article supplement (doi:10.1039/c9ay00070d), 2019-01-01
Supplement: c9ay00070d1.pdf [file c9ay00070d1.pdf]

## Supporting Information

### Development of a Whole-cell Biosensor for the Determination of Tyrosine in Urine for Point-of-care Diagnostics

**Chieh Lin<sup>a†</sup>, Qian-Xian Zhang<sup>a†</sup>, and Yi-Chun Yeh<sup>a\*</sup>**

*<sup>a</sup> Department of Chemistry, National Taiwan Normal University, 88, Section 4,  
Tingzhou Road, Taipei 11677, Taiwan*

† These authors contributed equally to this work.

\*Corresponding author: Yi-Chun Yeh

E-mail: [yichuny@ntnu.edu.tw](mailto:yichuny@ntnu.edu.tw). Phone: +886277346117. Fax: +886229324249

**Table S1.** Bacterial strains used in this study

| <b>Strain</b>                                | <b>Relevant genotype</b>                                                                                                                                              | <b>Source</b>                                            |
|----------------------------------------------|-----------------------------------------------------------------------------------------------------------------------------------------------------------------------|----------------------------------------------------------|
| <b><i>E. coli</i> DH5<math>\alpha</math></b> | F <sup>-</sup> endA1 glnV44 thi-1 recA1 relA1<br>gyrA96 deoR nupG $\Phi$ 80dlacZ $\Delta$ M15<br>$\Delta$ (lacZYA-argF)U169 hsdR17(rK-<br>mK+) $\lambda$ <sup>-</sup> | Purchased from Protech<br>Technology                     |
| <b>YCY_737</b>                               | <i>E. coli</i> DH5 $\alpha$<br><i>pLacUV5-tyrR-ParoF-rfp-PtyrP-GFP</i>                                                                                                | pYCY_737 transformed<br>into <i>E. coli</i> DH5 $\alpha$ |
| <b>YCY_795</b>                               | <i>E. coli</i> DH5 $\alpha$<br><i>P14-tyrR-ParoF-RFP-PtyrP-GFP</i>                                                                                                    | pYCY_795 transformed<br>into <i>E. coli</i> DH5 $\alpha$ |
| <b>YCY_815</b>                               | <i>E. coli</i> DH5 $\alpha$<br><i>pTet-tyrR-ParoF-rfp-PtyrP-GFP</i>                                                                                                   | pYCY_815 transformed<br>into <i>E. coli</i> DH5 $\alpha$ |
| <b>YCY_851</b>                               | <i>E. coli</i> DH5 $\alpha$<br><i>P14-tyrR-ParoF-RFP-PtyrP+3-GFP</i>                                                                                                  | pYCY_851 transformed<br>into <i>E. coli</i> DH5 $\alpha$ |
| <b>YCY_890</b>                               | <i>E. coli</i> DH5 $\alpha$<br><i>P14-tyrR-ParoF-RFP-PtyrP+3-<br/>RBS30-GFP</i>                                                                                       | pYCY_890 transformed<br>into <i>E. coli</i> DH5 $\alpha$ |
| <b>YCY_891</b>                               | <i>E. coli</i> DH5 $\alpha$<br><i>P14-tyrR-ParoF-RFP-PtyrP+3-<br/>RBS34-GFP</i>                                                                                       | pYCY_891 transformed<br>into <i>E. coli</i> DH5 $\alpha$ |
| <b>YCY_930</b>                               | <i>E. coli</i> DH5 $\alpha$<br><i>P14-tyrR-ParoF-RBS30-RFP-<br/>PtyrP+3-RBS30-GFP</i>                                                                                 | pYCY_930 transformed<br>into <i>E. coli</i> DH5 $\alpha$ |

**Table S2.** Plasmids used in this study

| <b>Plasmid</b>  | <b>Relevant genotype</b>                                                                           | <b>Source</b>                                                                                                                                                                                                                       |
|-----------------|----------------------------------------------------------------------------------------------------|-------------------------------------------------------------------------------------------------------------------------------------------------------------------------------------------------------------------------------------|
| <b>pYCY_019</b> | pBbE2k plasmid with<br><i>TetR(rev)-pTetR/A(rev)-RFP</i> ,<br><i>Kan<sup>R</sup></i>               | 1                                                                                                                                                                                                                                   |
| <b>pYCY_020</b> | pBbE5k plasmid with<br><i>LacI(rev)-pLacI(rev)-</i><br><i>pLacUV5-RFP</i> , <i>Kan<sup>R</sup></i> | 1                                                                                                                                                                                                                                   |
| <b>pYCY_658</b> | pBbE5k plasmid with<br><i>ParoF-rfp</i> , <i>Kan<sup>R</sup></i>                                   | PCR fragments of <i>ParoF</i> were amplified with primer 583 and 584, from <i>E. coli</i> DH5 $\alpha$ as the template. The PCR products were digested with EcoRI and BamHI, and cloned into plasmid pYCY_020 with EcoRI and BglII. |
| <b>pYCY_663</b> | pBbE5k plasmid with<br><i>PtyrP-gfp</i> , <i>Kan<sup>R</sup></i>                                   | PCR fragments of <i>PtyrP</i> were amplified with primer 585 and 586, from <i>E. coli</i> DH5 $\alpha$ as the template. The PCR products were digested with EcoRI and BamHI, and cloned into plasmid pYCY_020 with EcoRI and BglII. |
| <b>pYCY_681</b> | pBbE5k plasmid with<br><i>pLacUV5-tyrR-ParoF-rfp</i> ,<br><i>Kan<sup>R</sup></i>                   | PCR fragments of <i>tyrR</i> were amplified with primer 603 and 588, from <i>E. coli</i> DH5 $\alpha$ as the template. The PCR products were digested with EcoRI and BamHI, and cloned into plasmid pYCY_658 with EcoRI and BglII.  |
| <b>pYCY_682</b> | pBbE5k plasmid with<br><i>pLacUV5-tyrR-PtyrP-gfp</i> ,<br><i>Kan<sup>R</sup></i>                   | PCR fragments of <i>tyrR</i> were amplified with primer 603 and 588, from <i>E. coli</i> DH5 $\alpha$ as the template. The PCR products were digested with EcoRI and BamHI, and cloned into plasmid pYCY_663 with EcoRI and BglII.  |
| <b>pYCY_712</b> | pBbE5k plasmid with<br><i>P14-RFP</i> , <i>Kan<sup>R</sup></i>                                     | DNA fragments of P14 were annealed with primer 631 and 632,                                                                                                                                                                         |

|                 |                                                                              |                                                                                                                                                                                                                    |
|-----------------|------------------------------------------------------------------------------|--------------------------------------------------------------------------------------------------------------------------------------------------------------------------------------------------------------------|
|                 |                                                                              | and cloned into plasmid pYCY_20 with AatII and EcoRI.                                                                                                                                                              |
| <b>pYCY_734</b> | pBbE5k plasmid with <i>P14-tyrR-ParoF-RFP, Kan<sup>R</sup></i>               | DNA fragments of <i>tyrR-ParoF-RFP</i> from pYCY_681 were digested with EcoRI and XhoI, and subcloned into plasmid pYCY_712.                                                                                       |
| <b>pYCY_737</b> | pBbE5k plasmid with <i>pLacUV5-tyrR-ParoF-rfp-PtyrP-gfp, Kan<sup>R</sup></i> | PCR fragments of <i>PtyrP-GFP</i> were amplified with primer 637 and 639, from pYCY_663 as the template. The PCR products were digested with BglII and XhoI, and cloned into plasmid pYCY_681 with BamHI and XhoI. |
| <b>pYCY_795</b> | pBbE5k plasmid with <i>P14-tyrR-ParoF-RFP-PtyrP-GFP, Kan<sup>R</sup></i>     | PCR fragments of <i>PtyrP-GFP</i> were amplified with primer 637 and 639, from pYCY_663 as the template. The PCR products were digested with BglII and XhoI, and cloned into plasmid pYCY_734 with BamHI and XhoI. |
| <b>pYCY_815</b> | pBbE2k plasmid with <i>pTet-tyrR-ParoF-rfp-PtyrP-gfp</i>                     | DNA fragments of <i>tyrR-ParoF-RFP-PtyrP-GFP</i> from pYCY_795 were digested with EcoRI and XhoI, and subclone into plasmid pYCY_19.                                                                               |
| <b>pYCY_851</b> | pBbE5k plasmid with <i>P14-tyrR-ParoF-RFP-PtyrP+3-GFP, Kan<sup>R</sup></i>   | Mutation of <i>PtyrP+3</i> were mutated with primer 695 and 696, from pYCY_795 as the template.                                                                                                                    |
| <b>pYCY_890</b> | pBbE5k plasmid with <i>P14-tyrR-ParoF-RFP-PtyrP+3-RBS30-GFP</i>              | DNA fragments of RBS30 were annealed with primer 715 and 716, and cloned into plasmid pYCY_851 with BglII and NdeI.                                                                                                |
| <b>pYCY_891</b> | pBbE5k plasmid with                                                          | DNA fragments of RBS34 were annealed with primer 717 and 718,                                                                                                                                                      |

|                 |                                                                          |                                                                                                            |
|-----------------|--------------------------------------------------------------------------|------------------------------------------------------------------------------------------------------------|
|                 | <i>P14-tyrR-ParoF-RFP-PtyrP+3-RBS34-GFP</i>                              | and cloned into plasmid pYCY_851 with BglII and NdeI.                                                      |
| <b>pYCY_930</b> | pBbE5k plasmid with<br><i>P14-tyrR-ParoF-RBS30-RFP-PtyrP+3-RBS30-GFP</i> | Deletions RBS were used primer 763 and 764, and insertions DNA fragments of RBS30 with primer 772 and 773. |

**Table S3.** Primers used in this study

| <b>Primer</b>                      | <b>Sequence (5'→3')</b>                                                     |
|------------------------------------|-----------------------------------------------------------------------------|
| 0583_EcoR<br>I-BglII-<br>ParoF_for | TTTTGAATTCtttAGATCTagggagtgtaaattatctatacagagtaag                           |
| 0584_ParoF<br>-<br>BamHI_rev       | TTTTGGATCCgatggcgatcctgtttatgctc                                            |
| 0585_EcoR<br>I-BglII-<br>PtyrP_for | TTTTGAATTCtttAGATCTgcctagcgtagcgattgcc                                      |
| 0586_PtyrP<br>-<br>BamHI_rev       | TTTTGGATCCgctttcttctgctgacgatctt                                            |
| 0588_tyrR-<br>ter-<br>BamHI_rev    | TTTTGGATCCaaaaaaaccccgccctgtagggcgggggttttttttactcttcgttctt<br>cttctgactcag |
| 0603_EcoR<br>I-RBS-<br>tyrR_for    | TTTTGAATTCttaagaaggagatatattatgcgctctggaagtctttgtga                         |
| 0631_P14<br>promoter<br>(AT)_for   | CttgacaattaatcatccggctcgataatgtgtggaG                                       |
| 0632_P14<br>promoter<br>(AT)_rev   | AATTCtccacacattatacagccggatgattaattgtcaaGACGT                               |
| 0637_BglII-<br>term_for            | TTTTAGATCTaaaaaaaacccggcccctga                                              |
| 0639_GFP-<br>BamHI-<br>XhoI_rev    | TTTTCTCGAGtttGGATCCttactgtacagctc                                           |
| 0695_PtyrP<br>+3 (m)_F             | TCGtatgtaacgctcggttgac                                                      |
| 0696_PtyrP<br>+3 (m)_R             | tggtgtaaatataaatgtacaataaaaag                                               |
| 0715_BglII-<br>RBS30-<br>NdeI 5'fw | GATCTtctagagATTAAAGAGGAGAAAtacCA                                            |

---

0716\_BglIII- TATGgtaTTTCTCCTCTTTAATctctagaA

RBS30-

NdeI 3'rw

0717\_BglIII- GATCTtctagagAAAGAGGAGAAAtacCA

RBS34-

NdeI 5'fw

0718\_BglIII- TATGgtaTTTCTCCTCTTTtctctagaA

RBS34-

NdeI 3'rw

0763\_890 CATATGGCGAGTAGCGAAG

ParoF-

dRBS-RFP

F'w

0764\_890 AGATCCGATGGCGATCCT

ParoF-

dRBS-RFP

R'w

772\_ParoF- ttaatctctagaCATATGGCGAGTAGCGAAG

RBS30-

RFP 5'fw

773\_ParoF- ctctttaatcAGATCCGATGGCGATCCT

RBS30-

RFP 3'rw

---

**Table S4. TyrR protein levels and their induced fluorescence outputs.**

|        |       |          |       |
|--------|-------|----------|-------|
| in Tyr | P14   | PLacUV5* | Ptet  |
| GFP    | 1.440 | 1.056    | 0.980 |
| RFP    | 0.522 | 0.056    | 0.174 |
| in Phe | P14   | PLacUV5* | Ptet  |
| GFP    | 0.969 | 1.385    | 1.088 |
| RFP    | 0.952 | 0.811    | 0.983 |

The fluorescence induction folds of GFP/RFP in the presence of Tyr and Phe at 100  $\mu$ M when TyrR was driven by P14, PlacUV5, and Ptet promoters.

**Table S5.** Comparison of the current method with recent reported studies in Tyr detection.

| <b>Method</b>          | <b>Linear range (<math>\mu\text{M}</math>)</b> | <b>LOD (<math>\mu\text{M}</math>)</b> | <b>Analysis time</b>                     | <b>Ref.</b>  |
|------------------------|------------------------------------------------|---------------------------------------|------------------------------------------|--------------|
| GC-MS                  | 5.0-160                                        | 1.6                                   | 18 min<br>(excluding pretreatment steps) | <sup>2</sup> |
| HPLC-UV                | 1.25-80                                        | 0.31                                  | 7 min<br>(excluding pretreatment steps)  | <sup>3</sup> |
| Electrochemical sensor | 1-100                                          | 0.39                                  | 4 min                                    | <sup>4</sup> |
| LC-MS                  | 5.5-110                                        | 2.2                                   | 7 min<br>(excluding pretreatment steps)  | <sup>5</sup> |
| Cell-based             | 5-150                                          | 4.72                                  | 5 hr                                     | This work    |



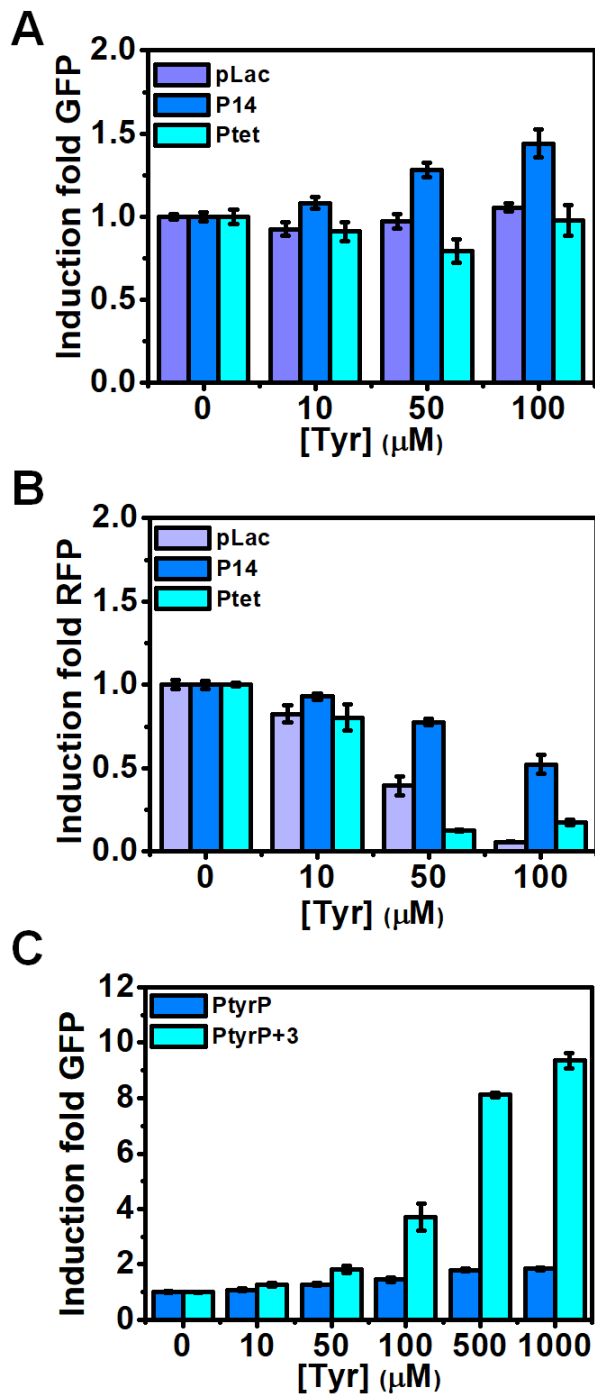

**Figure S1** The fluorescence induction folds of (A) GFP and (B) RFP of plasmids carrying various promoters for TyrR expression. (C) The induction folds of GFP of cells carrying P14-TyrR-PtyrP/PtyrP+3-GFP plasmids.

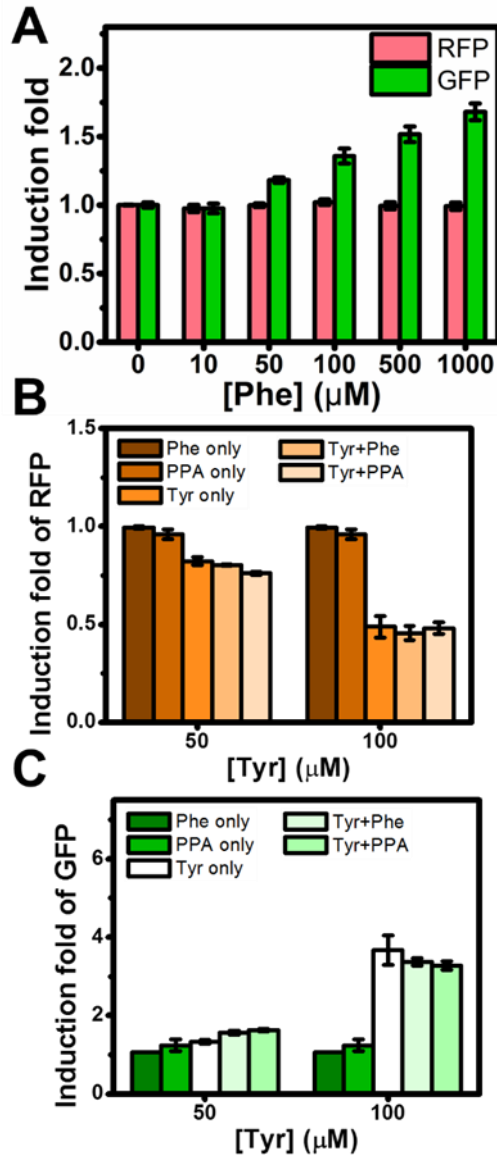

**Figure S2.** (A) Induction fold of sensor cells in the presence of Phe at various concentrations. (B) RFP and (C) GFP interference test of sensor cells in the co-existence of Phe and PPA.

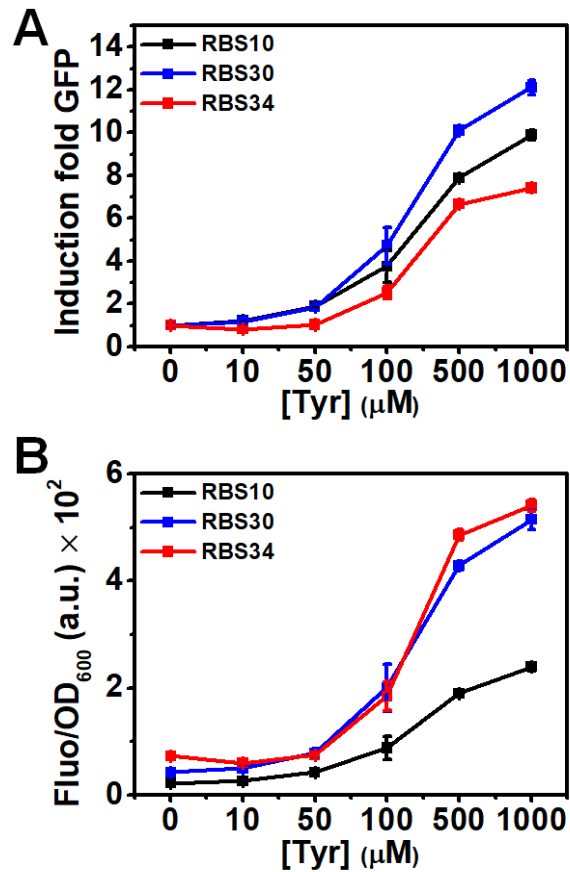

**Figure S3.** Comparison of (A) induction folds and (B) fluorescence intensities/OD<sub>600</sub> of 24 h post-induction of various ribosome-binding sites.

1. T. S. Lee, R. A. Krupa, F. Zhang, M. Hajimorad, W. J. Holtz, N. Prasad, S. K. Lee and J. D. Keasling, *J. Biol. Eng.*, 2011, **5**, 12.
2. C. Deng, Y. Deng, B. Wang and X. Yang, *J. Chromatogr. B*, 2002, **780**, 407-413.
3. G. Neurauter, S. Scholl-Bürgi, A. Haara, S. Geisler, P. Mayersbach, H. Schennach and D. Fuchs, *Clin. Biochem.*, 2013, **46**, 1848-1851.
4. Z. Wei, Y. Yang, L. Zhu, W. Zhang and J. Wang, *RSC Adv.*, 2018, **8**, 13333-13343.
5. S. Andrenšek, A. Golc-Wondra and M. Prosek, *J. AOAC Int.*, 2003, **86**, 753-758.
